17 **Abstract**

18 The bacterial tubulin FtsZ is the central component of the division machinery, coordinating an  
19 ensemble of proteins involved in septal cell-wall synthesis to ensure successful constriction.  
20 How cells achieve this coordination is unknown. We used a combination of imaging, genetic  
21 and biochemical approaches to demonstrate that in *Escherichia coli* cells FtsZ exhibits dynamic  
22 treadmilling predominantly determined by its GTPase activity, and that the treadmilling  
23 dynamics directs processive movement of the septal cell-wall synthesis machinery. In FtsZ  
24 mutants with severely reduced treadmilling, the spatial distribution of septal synthesis and the  
25 molecular composition and ultrastructure of the septal cell wall are substantially altered. Thus,  
26 the treadmilling of FtsZ provides a novel and robust mechanism for achieving uniform septal  
27 cell-wall synthesis to enable correct new pole morphology.

## 28 Main Text

29 The tubulin homolog FtsZ (1) is the central component of the cell division machinery in nearly  
30 all walled bacterial species (2). During division, FtsZ polymerizes on the cytoplasmic face of the  
31 inner membrane to form a ring-like structure (the Z-ring) and recruits more than thirty proteins  
32 to the division site, many of them involved in septal synthesis of the peptidoglycan (PG) cell  
33 wall (3). The GTPase activity of FtsZ is highly conserved, and the binding and hydrolysis of  
34 GTP underlie the dynamic assembly and disassembly of FtsZ polymers (4, 5). Hydrolysis  
35 dynamics also form the basis for several prevalent mechanisms by which the Z-ring could  
36 generate constriction forces (6). However, in *Escherichia coli* cells, GTPase activity of FtsZ  
37 appears nonessential for cell division: G105S (FtsZ84) cells constrict at the same rate as wildtype  
38 (WT) (7) despite an ~80-90% reduction in GTPase activity *in vitro* (8, 9), and a number of other  
39 GTPase mutants are viable despite various division defects (10). Thus, while it has been clearly  
40 demonstrated that FtsZ's GTPase activity is coupled to the highly dynamic structural  
41 organization of the Z-ring (4, 11), the biological function of the conserved GTPase activity of  
42 FtsZ in bacterial cell division remains elusive. Here, we use a combination of imaging, genetic,  
43 and biochemical approaches to demonstrate that FtsZ's GTPase activity powers treadmilling of  
44 the Z-ring, which directs the processive movement of the septal cell-wall synthesis machinery to  
45 ensure uniformly distributed incorporation of new cell wall, and hence plays a critical role in  
46 polar morphogenesis during cell division.

47 To understand the dynamic structural reorganization of the Z-ring, we first  
48 characterized WT Z-ring dynamics in live *E. coli* BW25113 cells by monitoring the fluorescence

49 of FtsZ-GFP expressed in the presence of endogenous, unlabeled FtsZ (FtsZ-GFP is  $46\% \pm 4.3\%$   
50 of total FtsZ concentration, mean  $\pm$  standard deviation, ( $\mu \pm$  s.d.),  $n = 3$ , fig. S1) using total  
51 internal reflection microscopy (TIRF) (12). The TIRF illumination confines the imaging window  
52 to a thin layer of  $\sim 80$  nm in depth and  $\sim 500$  nm in width at the bottom of the cell (fig. S2) (12),  
53 enabling high sensitivity and minimizing photobleaching. Interestingly, in contrast to the  
54 roughly constant fluorescence intensity of Z-rings commonly observed in wide-field  
55 fluorescence imaging, we found that the integrated TIRF intensity of the Z-ring exhibited large,  
56 approximately periodic fluctuations (Fig. 1A and B, fig. S3, Movies S1, S2). We observed similar  
57 behaviors using a different fluorescent protein fusion to FtsZ (fig. S4A, D) and of a GFP-ZapA  
58 fusion (fig. S4B) that binds to FtsZ and complements a null *zapA* mutant in the absence of  
59 labeled FtsZ (13). Furthermore, this behavior was absent in fixed cells (fig. S4C). Thus,  
60 combined with our previous observation that FtsZ-GFP and FtsZ co-assemble into polymers  
61 within the Z-ring (7), we conclude that the fluctuations in FtsZ-GFP fluorescence intensity  
62 represent overall FtsZ dynamics, and likely reflect repeated assembly and disassembly cycles of  
63 FtsZ polymers in the Z-ring.

64 We used the power spectrum density (PSD), a way to characterize the amplitude of  
65 different frequency components in a signal, to analyze the intensity fluctuations. We found that  
66 the PSDs of individual cells displayed clear peaks between 0.005-0.02 Hz (Fig. 1C), signifying  
67 characteristic periods of 50-200 s. The mean PSD across all cells (Fig. 1D, black dots;  $n = 333$   
68 cells) is significantly different from the monotonic decay (Fig. 1D, red dashed curve) predicted  
69 from a kinetic model in which only the stochastic exchange of FtsZ subunits between the Z-ring  
70 and the cytoplasmic pool is taken into account (4, 5, 12), indicating the presence of other

71 dynamic processes of the Z-ring. Subtracting the contribution of stochastic subunit exchange  
72 from the mean PSD curve (12) resulted in a log-normal-like distribution (Fig. 1D, green curve)  
73 with a peak frequency of  $0.0087 \pm 0.0007$  Hz ( $\mu \pm$  s.e.  $n = 333$  cells, Table S1), corresponding to a  
74 period of  $115 \pm 10$  s. Autocorrelation analysis of the time traces further confirmed the same time  
75 scale (fig. S5). To estimate the assembly size, which we define as the number of FtsZ molecules  
76 assembled in each fluorescence intensity peak in the TIRF imaging window (Fig. 1B, black  
77 arrow head), we calibrated the fluorescence intensity of FtsZ-GFP with cellular expression  
78 levels of FtsZ and FtsZ-GFP (fig. S1, S6) (12), and arrived at  $683 \pm 439$  molecules (Fig. 1E,  $\mu \pm$   
79 s.d.,  $n = 2039$  peaks, including both FtsZ and FtsZ-GFP). The large number of molecules  
80 suggests the presence of multiple FtsZ protofilaments, likely corresponding to the smaller FtsZ  
81 clusters previously observed via superresolution imaging (7). Notably, the assembly and  
82 disassembly rates of these FtsZ polymers estimated from the fluorescence rises (blue line in Fig.  
83 1B) and falls (red line in Fig. 1B) in the periodic fluctuations, respectively, are essentially the  
84 same (assembly rate =  $16.7 \pm 14.6$  FtsZ/s,  $\mu \pm$  s.d.,  $n = 5393$  fluorescence rises; disassembly rate =  
85  $16.8 \pm 14.0$  FtsZ/s,  $n = 5549$  fluorescence falls; Fig. 1F), suggesting that the continuous assembly  
86 and disassembly of FtsZ polymers are in a dynamic steady state.

87 Previous studies have shown that the dynamic circumferential movement of MreB, an  
88 actin homolog that spatially organizes cell-wall synthesis (14), is driven by PG-synthesis  
89 enzymes in both *E. coli* (15) and *Bacillus subtilis* (16, 17). To test whether our observed dynamics  
90 of FtsZ polymers is also driven by PG synthesis, we treated cells with specific inhibitors of MreB  
91 (A22), the bifunctional division-specific glycosyltransferase and transpeptidase PBP1b  
92 (cefsulodin), the elongation-specific transpeptidase PBP2 (mecillinam), and the division-specific

93 transpeptidase FtsI (PBP3) (cephalexin) at concentrations above their minimum inhibition  
94 concentration (12). In contrast to MreB, periodic FtsZ fluctuations quantified by PSD analysis  
95 remained identical to those in WT cells for all treatments (Fig. 1G, Table S2). To test whether the  
96 dynamics is influenced by other proteins that affect Z-ring assembly, we further examined ten  
97 mutant backgrounds individually lacking one of the proteins that regulates (SlmA, SulA, MinC,  
98 ClpX, and ClpP) or stabilizes (ZapA, ZapB, ZapC, ZapD and MatP) the Z-ring (12, 18). None of  
99 these genetic perturbations substantially affected Z-ring behavior (Fig. 1H,I, Table S3). These  
100 data suggest that the observed dynamics of the Z-ring are only marginally impacted by cell-  
101 wall synthesis or protein regulators, and instead are likely due to FtsZ's intrinsic  
102 polymerization properties, which are known to be related to GTPase activity.

103 To examine whether GTPase activity influences the periodic assembly and disassembly  
104 dynamics, we constructed seven strains each containing a single point mutation at the  
105 chromosomal *ftsZ* locus (E238A, E250A, D269A, G105S, D158A, D212A, or D212G) (12). These  
106 mutants have previously been reported to alter GTP hydrolysis activity to different degrees (19).  
107 Using purified proteins, we measured these mutants' GTPase activity *in vitro* under our  
108 experimental conditions (12, 20), and found that that their catalytic turnover rates ( $k_{cat}$ ) ranged  
109 from 14% to 71% of FtsZ<sup>WT</sup> (fig. S7A, Table S1) (12). Note that because of the high cellular  
110 concentration of GTP (~5 mM) (21), the *in vivo* GTPase activity of these mutants should mainly  
111 represent their maximal GTP hydrolysis rate (reflected in  $k_{cat}$ ), even though there are differences  
112 in GTP-binding affinity (fig. S7A, Table S1).

113 Consistent with reports that defects in GTP hydrolysis severely impact FtsZ assembly *in*  
114 *vitro* (22), we found that the periodic assembly and disassembly dynamics of the Z-ring were  
115 significantly reduced in mutants with lower GTPase activity, and essentially abolished in the  
116 D212A and D212G mutants, which has the most severe reductions in activity (Fig. 1J, K, Table  
117 S1). In addition, the subunit-exchange rates ( $k_{ex}$ ) of these mutants extracted from the PSD curves  
118 (Fig. 1K) or using fluorescence recovery after photobleaching (FRAP) (fig. S7C to E) decreased  
119 with  $k_{cat}$  (12), consistent with the expectation that these dynamics are coupled to GTP hydrolysis.  
120 We observed the same trend using GFP-ZapA as a marker for the unlabeled Z-ring in these  
121 mutants (fig. S4E). The fluctuation frequency and subunit exchange rate of each mutant were  
122 highly correlated with  $k_{cat}$  ( $R_{Spearman} = 0.81, p = 0.02$  and  $R_{Spearman} = 0.93, p = 0.002$ , Fig. 1K, L,  
123 respectively), and with each other ( $R_{Spearman} = 0.90, p = 0.005$ , Fig. 1M). Clearly, the periodic  
124 dynamics of FtsZ polymers in the Z-ring is strongly coupled to GTP hydrolysis.

125 What type of assembly/disassembly process gives rise to the observed periodic behavior  
126 of FtsZ polymers? In some kymographs of cells lacking well-defined midcell Z-rings, zigzags of  
127 FtsZ-GFP fluorescence were readily visible, indicating directional FtsZ polymer movement (fig.  
128 S8A, B and Movies S3-6). By imaging at higher temporal and spatial resolution (12), we  
129 identified that in many cells FtsZ polymers exhibited transverse, processive movement across  
130 the short axis of the cell (Fig. 2A, B, C, fig. S9, Movies S6-11). This processive movement was  
131 particularly prominent in shorter cells (64% of cells with length  $< 2.8 \mu\text{m}$ ,  $n = 53$  cells, Fig. 2A,  
132 C), prior to the establishment of a stable midcell Z-ring. In longer cells ( $\geq 2.8 \mu\text{m}$ ) in which the  
133 Z-ring is stably assembled at midcell, a smaller percentage of cells exhibited such dynamics

134 (34%,  $n = 41$  cells, Fig. 2B, C), likely because overlapping FtsZ polymers in the Z-ring could not  
135 be resolved under diffraction-limited imaging.

136 We and other groups previously showed that individual FtsZ molecules remain  
137 stationary in assembled FtsZ polymers (23-25). Therefore, the observed processive movement of  
138 FtsZ polymers is most consistent with polymerization at one end and depolymerization at the  
139 other, an essential feature of treadmilling. Indeed, treadmilling of FtsZ polymers assembled on  
140 supported lipid bilayers *in vitro* has recently been observed (24). Using kymographs, we  
141 measured the apparent polymerization and depolymerization speeds of each trajectory (Fig. 2C)  
142 (12). We found that while there were substantial variations in the speeds among individual  
143 cells, the distributions of polymerization and depolymerization speeds across the population of  
144 cells were similar (Kolmogorov-Smirnov test,  $p = 0.073$ ), with mean speeds of  $30 \pm 17$  nm/s ( $\mu \pm$   
145 s.d.,  $n = 91$  traces) and  $26 \pm 17$  nm/s, respectively (Fig. 2D, Table S1). This behavior is consistent  
146 with the classic definition of treadmilling dynamics, and hereafter we combined these two  
147 speeds together and used the average as the treadmilling speed (Table S1). Importantly, we  
148 found that the treadmilling speed of each mutant is strongly correlated with the corresponding  
149  $k_{cat}$  ( $R_{Spearman} = 0.95$ ,  $p = 0.001$ , Fig. 2E), and with the frequency of FtsZ-GFP periodic fluctuations  
150 ( $R_{Spearman} = 0.88$ ,  $p = 0.007$ , Fig. 2F). Thus, these data strongly imply that FtsZ's GTPase activity  
151 underlies the treadmilling behavior, which is responsible for the periodic assembly and  
152 disassembly dynamics of FtsZ polymers.

153 Next, we investigated the role of FtsZ treadmilling in *E. coli* cell division. Using scanning  
154 electron microscopy (SEM), we noticed that FtsZ mutants with severe disruptions to GTPase



155 activity exhibited abnormal septum morphology (Fig. 3A, fig. S10). In contrast to the smooth,  
156 symmetrically invaginated hemispherical septa in WT cells, mutant strains frequently exhibited  
157 slanted, twisted, and/or incomplete septa along the cell length and at the cell pole (Fig. 3A, fig.  
158 S10). It has previously been suggested that the pattern of FtsZ localization dictates the shape of  
159 the invaginating septum, based on the twisted and asymmetric septa observed in a  
160 temperature-sensitive FtsZ mutant (FtsZ26) that forms arcs and spirals rather than a ring along  
161 the membrane (26). Superresolution imaging in several bacterial species has revealed that the Z-  
162 ring is actually a discontinuous collection of FtsZ clusters (7, 11, 27-30), making it unclear how a  
163 smooth, hemispherical septum morphology is achieved. We hypothesize that treadmilling  
164 allows FtsZ polymers to evenly sample the surface of the growing septum over time, thereby  
165 ensuring a uniform spatial distribution of PG synthesis along the septum. In this scenario, Z-  
166 rings formed by arcs or clusters of GTPase mutants that essentially lack treadmilling ability,  
167 such as D212A/G, would not distribute septal PG synthesis evenly on average during  
168 constriction, resulting in incomplete and/or asymmetric septa.

169 To test this hypothesis, we directly probed the spatial pattern of septal PG synthesis. We  
170 pulse-labeled WT cells and three mutants (E250A, D158A, and D212G) using the fluorescent D-  
171 alanine analog HADA (31). HADA is incorporated into the *E. coli* cell wall and can be used as a  
172 marker for nascent septal PG synthesis (31, 32). We reasoned that if treadmilling serves to time-  
173 average the spatial pattern of septum synthesis, labeling pulses shorter than or similar to the  
174 treadmilling period (~100 s) should result in punctate, incomplete septal labeling, rather than  
175 low level but homogenous labeling, whereas longer pulses would completely label the septum  
176 because of treadmilling. Indeed, we observed that for short labeling pulses, >60% and >80% of

177 WT and D212G cells, respectively, displayed punctate incorporation of HADA at septa (Fig. 3B,  
178 C). With longer labeling pulses, the percentage of cells with incompletely labeled septa in WT  
179 cells and the mild GTPase mutant E250A (47% of WT GTPase activity and 63% of WT  
180 treadmill speed) rapidly dropped for labeling pulses of ~100 s or longer (Fig. 3B, C).  
181 However, large fractions of cells of the more drastic mutants D158A (16% of WT GTPase  
182 activity, 27% of WT treadmill speed) and D212G (14%, 6.7% respectively) still had  
183 incompletely labeled septa even after 1800 s (Fig. 3B, C). Interestingly, the total integrated  
184 fluorescence intensity of HADA at septa increased with longer labeling times, but there was no  
185 statistically significant difference between WT and the three mutants (Fig. 3D). While it remains  
186 to be verified that the incorporation rate of HADA is quantitatively proportional to the overall  
187 septal PG synthesis rate, we found that blocking the activity of either PBP1b or FtsI abolishes  
188 septal HADA incorporation (fig. S11), suggesting that HADA incorporation is specific to septal  
189 PG synthesis. Therefore, our labeling results are most consistent with the total septal PG  
190 synthesis activity not being significantly affected in FtsZ GTPase mutants, and instead the  
191 spatiotemporal distribution of synthesis is altered.

192       Next, we reasoned that since FtsZ recruits and scaffolds many proteins involved in  
193 septal synthesis, the spatiotemporal dynamics of the essential, septum-specific transpeptidase  
194 FtsI would likely follow that of FtsZ. We constructed a complementing (fig. S12), N-terminal  
195 fusion of FtsI to the photo-stable fluorescent protein TagRFP-T (33), and monitored its dynamics  
196 at visible constriction sites in FtsZ<sup>WT</sup> and three FtsZ<sup>mut</sup> backgrounds (D250A, D158A, and D212G)  
197 using wide-field epifluorescence microscopy. Strikingly, kymographs of TagRFP-T-FtsI  
198 fluorescence in FtsZ<sup>WT</sup> cells showed clear diagonal tracks similar to that of FtsZ (Fig. 4A),

199 indicating that FtsI exhibits processive redistribution along the septum. Most interestingly, in  
200 contrast to stationary FtsZ molecules in treadmilling FtsZ polymers (24), we found that  
201 individual TagRFP-T-FtsI molecules underwent directional movement along the septum (Fig.  
202 4A, Movie S13). The movement was not unidirectional and exhibited large variations in time  
203 and in different cells (Fig. 4A, fig. S13, Movies S14 -16). The mean speed of TagRFP-T-FtsI in  
204 FtsZ<sup>WT</sup> cells was  $19.3 \pm 21.2$  nm/s ( $\mu \pm$  s.d.,  $n = 154$  traces, Fig. 4E). In the three FtsZ<sup>Mut</sup> strains,  
205 TagRFP-T-FtsI moved more slowly (Fig. 4B, C and D) with speeds that were linearly correlated  
206 with those of FtsZ treadmilling ( $R_{\text{Pearson}} = 1$ ,  $p < 10^{-45}$ , Fig. E). Thus, these data strongly indicate  
207 that FtsZ uses treadmilling powered by GTP hydrolysis to guide the directional movement of  
208 FtsI, and thereby direct the spatiotemporal distribution of septal cell-wall synthesis.

209 Finally, since the spatial distribution pattern of cell-wall synthesis, the speed of FtsI's  
210 directional movement along the septum, and the resulting septal morphology were disrupted in  
211 FtsZ<sup>mut</sup> cells, we investigated whether the biochemical composition and ultrastructure of the PG  
212 itself were altered. Using ultra performance liquid chromatography (UPLC), we quantified the  
213 proportion of each muropeptide species comprising cell walls isolated from WT and D212G  
214 cells, after growth in LB and minimal media (12). In both media, we observed that D212G cells  
215 have shorter glycan strands and higher crosslinking compared with WT (Fig. 4F, fig. S14A),  
216 indicating imbalances in the relative levels of glycan strand polymerization and crosslinking  
217 within the septal PG synthesis machinery of FtsZ<sup>D212G</sup> cells. We also observed a large (~3-fold)  
218 increase in alternative Dap-Dap crosslinks (Fig. 4F), indicating that both the magnitude and the  
219 nature of crosslinking reactions was perturbed. To verify whether the difference could be due to  
220 the fact that D212G cells often have polarly localized Z-rings that produce round, DNA-less

221 minicells, the PG composition of which essentially represents that of a cell pole, we compared  
222 the PG composition of minicells isolated from D212G and a BW25113  $\Delta minC$  strain; the latter  
223 also produces minicells due to misplacement of the Z-ring. We observed similar differences in  
224 PG composition in the minicells of both strains as with intact cells, indicating that the  
225 differences are not due to aberrant division site placement (fig. S14B). Interestingly, a  
226 *Caulobacter crescentus* FtsZ mutant lacking its C-terminal linker showed opposite changes (lower  
227 crosslinking and longer glycan strands), along with a septal cell wall bulging phenotype (34).  
228 Thus, the balance between glycan strand polymerization and crosslinking activities is likely  
229 important to define the shape of the septum (which eventually becomes the cell poles), and FtsZ  
230 likely coordinates the two enzymatic activities within the septal PG synthesis machinery.

231         Here, we have shown that FtsZ engages in treadmilling powered by GTP hydrolysis and  
232 organizes the spatial distribution and enzymatic activities of the septal PG synthesis machinery  
233 (a schematic model is shown in Fig. 4G). The broad conceptual similarities between FtsZ and  
234 MreB, with both illustrating complex dynamics of cytoskeletal proteins connected with cell-wall  
235 synthesis, suggest that coupling cytoskeletal motion to wall synthesis may be a general strategy  
236 across the kingdoms of life; indeed, movement of cellulose synthase complexes along cortical  
237 microtubules in plants mirrors the behavior of MreB and PG synthesis (35). However, the  
238 direction of causality for MreB and FtsZ are highly distinct: while MreB relies on wall synthesis  
239 for its movement, FtsZ exploits its innate treadmilling capacity to control the movement of  
240 septal synthesis. Treadmilling ensures evenly distributed wall synthesis through spatiotemporal  
241 averaging, loss of which can lead to aberrantly shaped or incomplete septa. Notably, a similar  
242 role has recently been demonstrated for the highly dynamic actomyosin contractile ring in

243 fission yeast (36), suggesting a general connection between rapid reorganization of the division  
244 machinery and the need for robust polar morphogenesis. It remains to be discovered at the  
245 molecular level how FtsZ's GTPase activity is coupled to treadmilling, how treadmilling directs  
246 FtsI movement, and whether other division proteins follow similar dynamics. In addition, it will  
247 be fascinating to probe whether the behaviors we have revealed are fully conserved across the  
248 bacterial kingdom.

## 249 **Acknowledgements**

250 The authors thank lab members in the Xiao and Huang labs for valuable discussions and  
251 technical assistance, Erin Goley, Petra Levin, Carla Coltharp, Ganhui Lan, Ethan Garner and  
252 Georgia Squyres for critical discussions of the work, Erkin Kuru, Yves Brun, and Mike  
253 VanNieuwenhze for the HADA dye and assistance in its use, Joe Lutkenhaus for the MC123  
254 strain, Harold Erickson for the FtsZ antibody, Erin Goley, Petra Levin, and their lab members  
255 for helpful advices on protein purification and GTPase assay, Roger Tsien for the TagRFP-T  
256 construct, and Michael Delannoy for assistance with SEM. This work was supported by NIH  
257 Director's New Innovator Award DP2OD006466 (to K.C.H.), NSF CAREER Award MCB-  
258 1149328 (to K.C.H.), a National Science Foundation Graduate Student Fellowship (to A.M.), an  
259 Achievement Rewards for College Scientists Fellowship (to A.M.), NIH R01 GM086447 (to J.X.),  
260 National Science Foundation Grant EAGER MCB1019000 (to J.X.), and a Hamilton Smith  
261 Innovative Research Award (to J.X.). This work was also supported in part by the National  
262 Science Foundation under Grant PHYS-1066293 and the hospitality of the Aspen Center for  
263 Physics.

## 264 References

- 265 1. E. Nogales, K. H. Downing, L. A. Amos, J. Lowe, Tubulin and FtsZ form a distinct  
266 family of GTPases. *Nat Struct Biol* **5**, 451-458 (1998).
- 267 2. S. Vaughan, B. Wickstead, K. Gull, S. G. Addinall, Molecular evolution of FtsZ protein  
268 sequences encoded within the genomes of archaea, bacteria, and eukaryota. *J Mol Evol*  
269 **58**, 19-29 (2004).
- 270 3. D. P. Haeusser, W. Margolin, Splitsville: structural and functional insights into the  
271 dynamic bacterial Z ring. *Nat Rev Microbiol* **14**, 305-319 (2016).
- 272 4. J. Stricker, P. Maddox, E. D. Salmon, H. P. Erickson, Rapid assembly dynamics of the  
273 Escherichia coli FtsZ-ring demonstrated by fluorescence recovery after photobleaching.  
274 *Proc Natl Acad Sci U S A* **99**, 3171-3175 (2002).
- 275 5. Y. Chen, K. Bjornson, S. D. Redick, H. P. Erickson, A rapid fluorescence assay for FtsZ  
276 assembly indicates cooperative assembly with a dimer nucleus. *Biophys J* **88**, 505-514  
277 (2005).
- 278 6. H. P. Erickson, Modeling the physics of FtsZ assembly and force generation. *Proc Natl*  
279 *Acad Sci U S A* **106**, 9238-9243 (2009).
- 280 7. C. Coltharp, J. Buss, T. M. Plumer, J. Xiao, Defining the rate-limiting processes of  
281 bacterial cytokinesis. *Proc Natl Acad Sci U S A* **113**, E1044-1053 (2016).
- 282 8. P. de Boer, R. Crossley, L. Rothfield, The essential bacterial cell-division protein FtsZ is a  
283 GTPase. *Nature* **359**, 254-256 (1992).
- 284 9. D. RayChaudhuri, J. T. Park, Escherichia coli cell-division gene ftsZ encodes a novel  
285 GTP-binding protein. *Nature* **359**, 251-254 (1992).
- 286 10. J. Stricker, H. P. Erickson, In vivo characterization of Escherichia coli ftsZ mutants:  
287 effects on Z-ring structure and function. *J Bacteriol* **185**, 4796-4805 (2003).
- 288 11. Z. Lyu, C. Coltharp, X. Yang, J. Xiao, Influence of FtsZ GTPase activity and  
289 concentration on nanoscale Z-ring structure in vivo revealed by three-dimensional  
290 Superresolution imaging. *Biopolymers* **105**, 725-734 (2016).
- 291 12. See supporting material online.
- 292 13. J. Buss *et al.*, A multi-layered protein network stabilizes the Escherichia coli FtsZ-ring  
293 and modulates constriction dynamics. *PLoS Genet* **11**, e1005128 (2015).
- 294 14. T. S. Ursell *et al.*, Rod-like bacterial shape is maintained by feedback between cell  
295 curvature and cytoskeletal localization. *Proc Natl Acad Sci U S A* **111**, E1025-1034 (2014).
- 296 15. S. van Teeffelen *et al.*, The bacterial actin MreB rotates, and rotation depends on cell-wall  
297 assembly. *Proc Natl Acad Sci U S A* **108**, 15822-15827 (2011).
- 298 16. E. C. Garner *et al.*, Coupled, circumferential motions of the cell wall synthesis machinery  
299 and MreB filaments in *B. subtilis*. *Science* **333**, 222-225 (2011).
- 300 17. J. Dominguez-Escobar *et al.*, Processive movement of MreB-associated cell wall  
301 biosynthetic complexes in bacteria. *Science* **333**, 225-228 (2011).
- 302 18. T. Baba *et al.*, Construction of Escherichia coli K-12 in-frame, single-gene knockout  
303 mutants: the Keio collection. *Molecular systems biology* **2**, 2006.0008 (2006).
- 304 19. C. Lu, J. Stricker, H. P. Erickson, Site-specific mutations of FtsZ--effects on GTPase and  
305 in vitro assembly. *BMC Microbiol* **1**, 7 (2001).

- 306 20. H. A. Arjes, B. Lai, E. Emelue, A. Steinbach, P. A. Levin, Mutations in the bacterial cell  
307 division protein FtsZ highlight the role of GTP binding and longitudinal subunit  
308 interactions in assembly and function. *BMC Microbiol* **15**, 209 (2015).
- 309 21. B. D. Bennett *et al.*, Absolute metabolite concentrations and implied enzyme active site  
310 occupancy in Escherichia coli. *Nature chemical biology* **5**, 593-599 (2009).
- 311 22. C. Lu, M. Reedy, H. P. Erickson, Straight and curved conformations of FtsZ are  
312 regulated by GTP hydrolysis. *J Bacteriol* **182**, 164-170 (2000).
- 313 23. J. Buss *et al.*, In vivo organization of the FtsZ-ring by ZapA and ZapB revealed by  
314 quantitative super-resolution microscopy. *Mol Microbiol* **89**, 1099-1120 (2013).
- 315 24. M. Loose, T. J. Mitchison, The bacterial cell division proteins FtsA and FtsZ self-organize  
316 into dynamic cytoskeletal patterns. *Nat Cell Biol* **16**, 38-46 (2014).
- 317 25. L. Niu, J. Yu, Investigating intracellular dynamics of FtsZ cytoskeleton with  
318 photoactivation single-molecule tracking. *Biophys J* **95**, 2009-2016 (2008).
- 319 26. S. G. Addinall, J. Lutkenhaus, FtsZ-spirals and -arcs determine the shape of the  
320 invaginating septa in some mutants of Escherichia coli. *Mol Microbiol* **22**, 231-237 (1996).
- 321 27. G. Fu *et al.*, In vivo structure of the E. coli FtsZ-ring revealed by photoactivated  
322 localization microscopy (PALM). *PLoS One* **5**, e12682 (2010).
- 323 28. M. P. Strauss *et al.*, 3D-SIM super resolution microscopy reveals a bead-like arrangement  
324 for FtsZ and the division machinery: implications for triggering cytokinesis. *PLoS Biol* **10**,  
325 e1001389 (2012).
- 326 29. S. J. Holden *et al.*, High throughput 3D super-resolution microscopy reveals *Caulobacter*  
327 *crescentus* in vivo Z-ring organization. *Proc Natl Acad Sci U S A* **111**, 4566-4571 (2014).
- 328 30. M. Jacq *et al.*, Remodeling of the Z-Ring Nanostructure during the *Streptococcus*  
329 *pneumoniae* Cell Cycle Revealed by Photoactivated Localization Microscopy. *mBio* **6**,  
330 (2015).
- 331 31. E. Kuru *et al.*, In Situ probing of newly synthesized peptidoglycan in live bacteria with  
332 fluorescent D-amino acids. *Angew Chem Int Ed Engl* **51**, 12519-12523 (2012).
- 333 32. A. K. Fenton, K. Gerdes, Direct interaction of FtsZ and MreB is required for septum  
334 synthesis and cell division in Escherichia coli. *EMBO J* **32**, 1953-1965 (2013).
- 335 33. N. C. Shaner *et al.*, Improving the photostability of bright monomeric orange and red  
336 fluorescent proteins. *Nature methods* **5**, 545-551 (2008).
- 337 34. K. Sundararajan *et al.*, The bacterial tubulin FtsZ requires its intrinsically disordered  
338 linker to direct robust cell wall construction. *Nat Commun* **6**, 7281 (2015).
- 339 35. A. R. Paredez, C. R. Somerville, D. W. Ehrhardt, Visualization of cellulose synthase  
340 demonstrates functional association with microtubules. *Science* **312**, 1491-1495 (2006).
- 341 36. Z. Zhou *et al.*, The contractile ring coordinates curvature-dependent septum assembly  
342 during fission yeast cytokinesis. *Mol Biol Cell* **26**, 78-90 (2015).

343

344

345 **Figure Legends**

346 **Figure 1: FtsZ polymers in the Z-ring exhibit periodic assembly and disassembly**

347 **dynamics that are coupled to GTPase activity.** (A) Top: Montages of live *E. coli* cells

348 showing periodic FtsZ-GFP intensity fluctuations. The time-lapse movie (frame rate: 1/s,

349 Movie S1) of the yellow-outlined cell at the bottom was used to generate the

350 kymograph of Z-ring intensity in the TIRF imaging window and the integrated Z-ring

351 fluorescence time trace (B). The black curve in (B) is the moving average (every 20

352 points) of the raw intensity (gray dots). The assembly and disassembly rates are

353 determined as the maximal slopes along each rise (blue line) and decay (red),

354 respectively. Assembly size, the maximum number of FtsZ molecules (FtsZ and FtsZ-

355 GFP) in the imaging window during each period indicated by the black arrow head in

356 (B), was estimated from the main intensity peaks using calibrations of FtsZ-GFP

357 fluorescence and expression level (12). Scale bars: 0.5  $\mu\text{m}$ . Corresponding time-lapse

358 movie and that of an additional cell were shown in Movies S1 and S2. (C)

359 Representative power spectrum density (PSD) curves for individual cells, with one cell

360 highlighted in solid red. (D) The mean PSD over all cells (black dots, error bars:

361 standard error (s.e.),  $n = 333$  cells), fitted with a model (blue curve) that takes into

362 account stochastic subunit exchange between the Z-ring and the cytoplasmic pool

363 (dashed red curve) and the periodic fluctuations (dashed green curve) (12). (D)

364 Distribution of assembly size of FtsZ polymers. The mean is  $683 \pm 439$  (s.d.,  $n = 2039$



365 fluorescence peaks), including both FtsZ and FtsZ-GFP. (E) Distributions of assembly (blue)  
366 and disassembly (red) rates. (G-J) Average PSD curves in drug-treated cells (G), in cells  
367 lacking Z-ring stabilizers (H) or regulators (I), and in cells expressing FtsZ GTPase  
368 mutants (J). Error bars: s.e. Sample size numbers (n) are indicated in the corresponding  
369 graphs. (K) Correlation between the GTPase catalytic turnover rate  $k_{\text{cat}}$  and the periodic  
370 frequency of FtsZ GTPase mutants. (L) Correlation between  $k_{\text{cat}}$  and the stochastic  
371 exchange rate  $k_{\text{ex}}$  of FtsZ GTPase mutants. (M) Correlation between  $k_{\text{ex}}$  and the periodic  
372 frequency of FtsZ GTPase mutants. Error bars: s.d.

373 **Figure 2: FtsZ polymers exhibit treadmilling dynamics in live *E. coli* cells.** (A and B)  
374 Maximum intensity projection (left) and montages of the time-lapse movie (right, frame  
375 rate: 2/s, Movies S6, S7) of a cell in which a midcell Z-ring has not assembled (A) and  
376 another cell in which a clear midcell Z-ring is visible (B). The corresponding kymograph  
377 of each cell computed from the intensity along the line between the two yellow arrows  
378 in the first frame of the montage in (A) and (B) was shown in (C). The polymerization  
379 and depolymerization speeds were measured from the leading (blue line) and trailing  
380 (red) edges of individual cells' kymographs as shown in (C), and the corresponding  
381 distributions were shown in (D). Scale bars: 0.5  $\mu\text{m}$ . (E) Polymerization and  
382 depolymerization speeds of FtsZ GTPase mutants correlate with  $k_{\text{cat}}$ . Error bars: s.d. (F)  
383 Absolute treadmilling speed (average of both polymerization and depolymerization

384 speeds) correlates with the periodic assembly/disassembly frequency of FtsZ polymers  
385 in FtsZ GTPase mutants. Error bars: s.d. (treadmilling speed) or s.e.(frequency).

386 **Figure 3: FtsZ GTPase mutants change the spatial distribution pattern but not the**

387 **total amount of septal PG synthesis.** (A) Representative SEM images of WT, E250A,

388 D158A, and D212G cells. Arrows denote deformed, asymmetric septa. (B)

389 Representative images of HADA-labeled septa for short (< 10 s), intermediate (90 s), and

390 long (810 s) labeling pulses. Arrows and arrowheads denote incomplete and complete

391 septa, respectively. (C) Severe GTPase mutants have large percentage of cells with

392 incompletely labeled septa even for long pulses. Error bars: s.e. (D) Integrated septal

393 HADA fluorescence increases similarly with labeling pulse duration in all strains. Error

394 bars: s.e.

395 **Figure 4: Altered directional movement of FtsI and septal PG composition in FtsZ<sup>mut</sup>**

396 **cells.** (A) Directional movement of multiple (left) or single (right) TagRFP-T-FtsI

397 molecules along the septum in FtsZ<sup>WT</sup> cells (see Movies S13 to S16). Maximum intensity

398 projections of the whole cell are shown on the left, and the corresponding kymographs

399 at positions denoted by arrows positions are shown on the right. (B-D) Directional

400 movement of TagRFP-T-FtsI in FtsZ D250A (B), D158A (C) and D212G (D) strains. Note

401 the punctate maximum intensity projection of TagRFP-T-FtsI (left) and the gradually

402 decreasing movement speed (slope of the diagonal line) on the kymographs (right) in

403 the order of D250A, D158A, and D212G strains. (E) The mean movement speed of

404 TagRFP-T-FtsI in the four strains is highly correlated with FtsZ treadmilling speed  
405 ( $R_{\text{Pearson}} = 1$ ,  $p = 10^{-45}$ , Table S1). The slightly slower TagRFP-T-FtsI speed compared to  
406 that of FtsZ is due to the projection of a curved cell surface in the epi-fluorescence  
407 imaging mode of FtsI (12). (F) UPLC analysis of PG composition of WT (dark blue bars)  
408 and D212G (orange hatched bars) grown in M9 media. The relative percentage of each  
409 component of D212G was normalized to that of WT cells. Error bars: s.d.  $n=3$ .  $*p < 0.05$ ,  
410  $**p < 0.01$  using unpaired t-test. (G) A schematic model depicting that the treadmilling  
411 of FtsZ polymers (dark and light gray circles) drives the directional movement (dashed  
412 arrows) of the septal PG synthesis machinery (brown rectangles), and hence leads to  
413 processive septal PG synthesis (yellow to red gradient indicates old to new PG).

414

415 Figure 1.

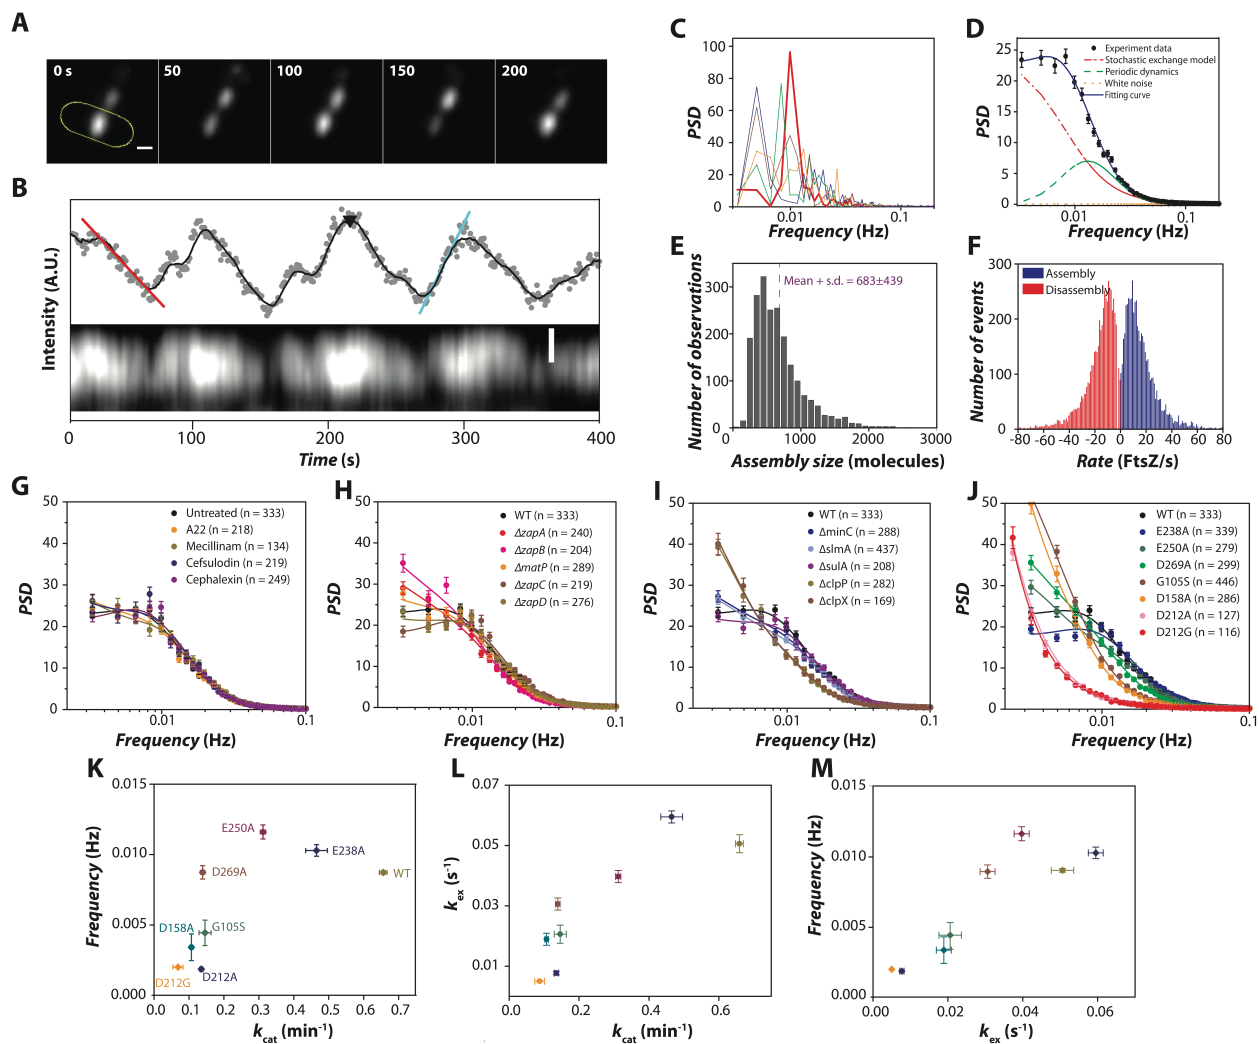

417 Figure 2.

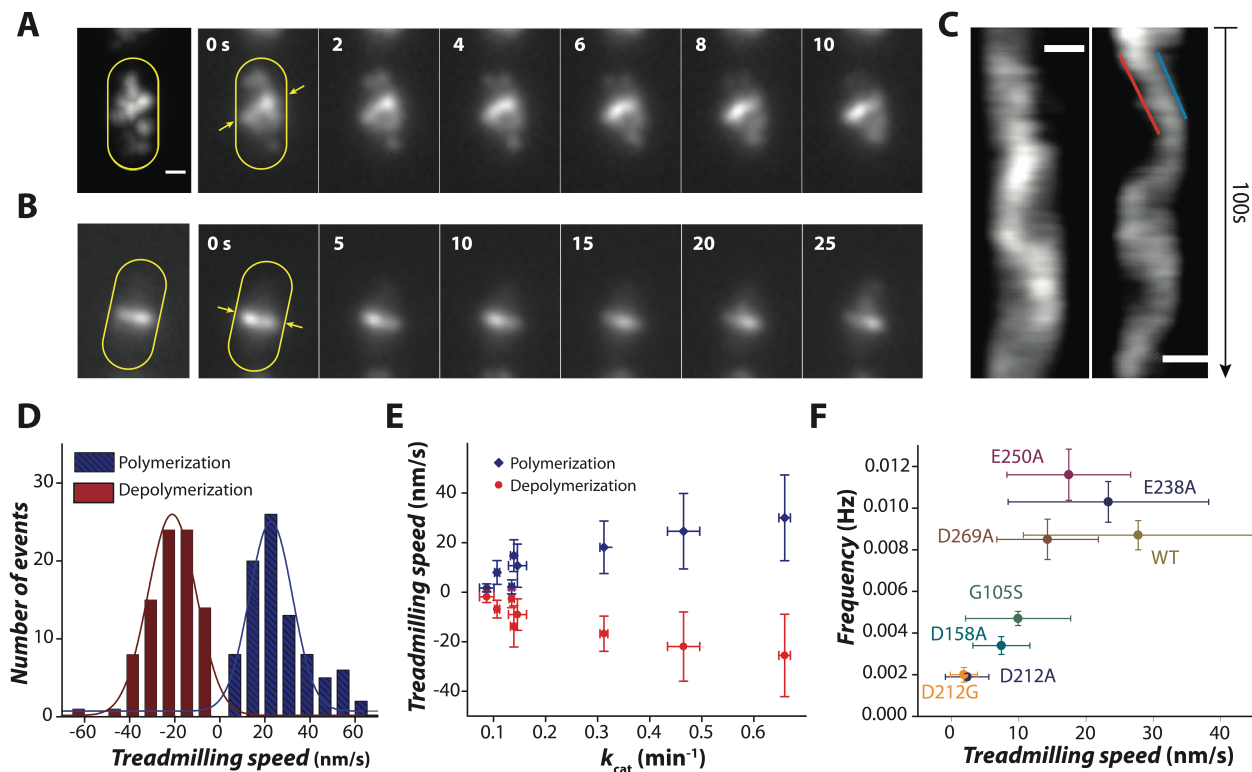

418

419 Figure 3.

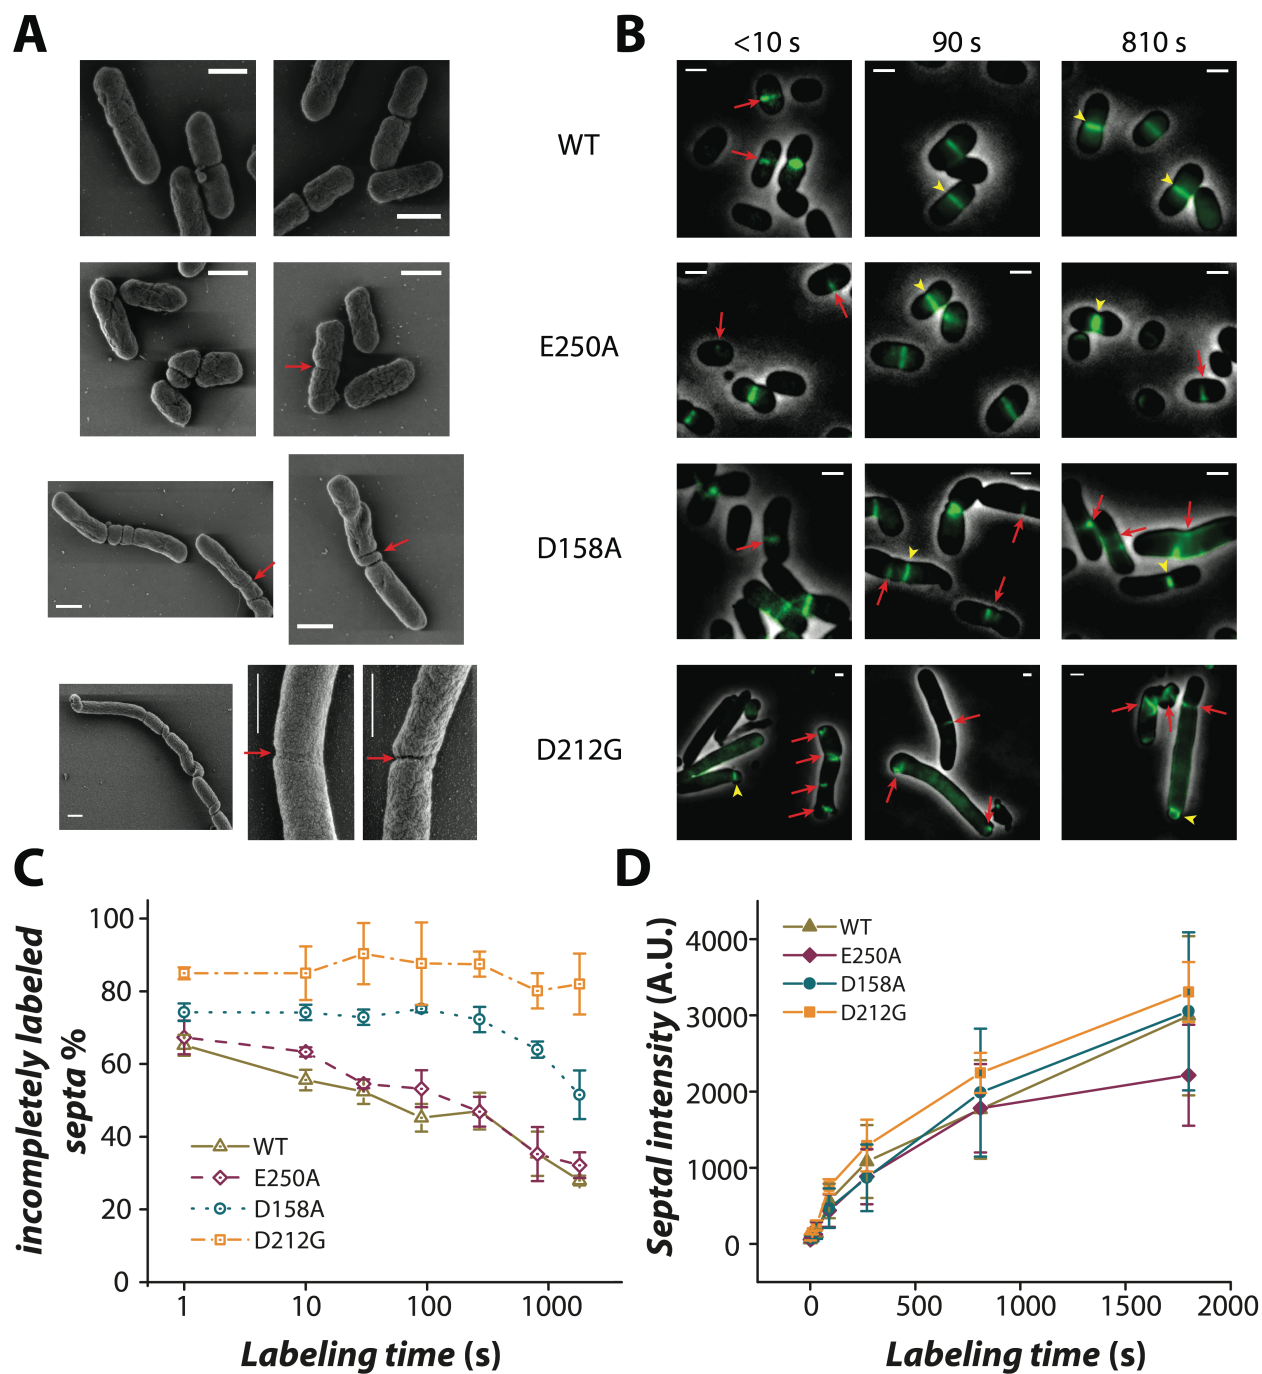

421 Figure 4.

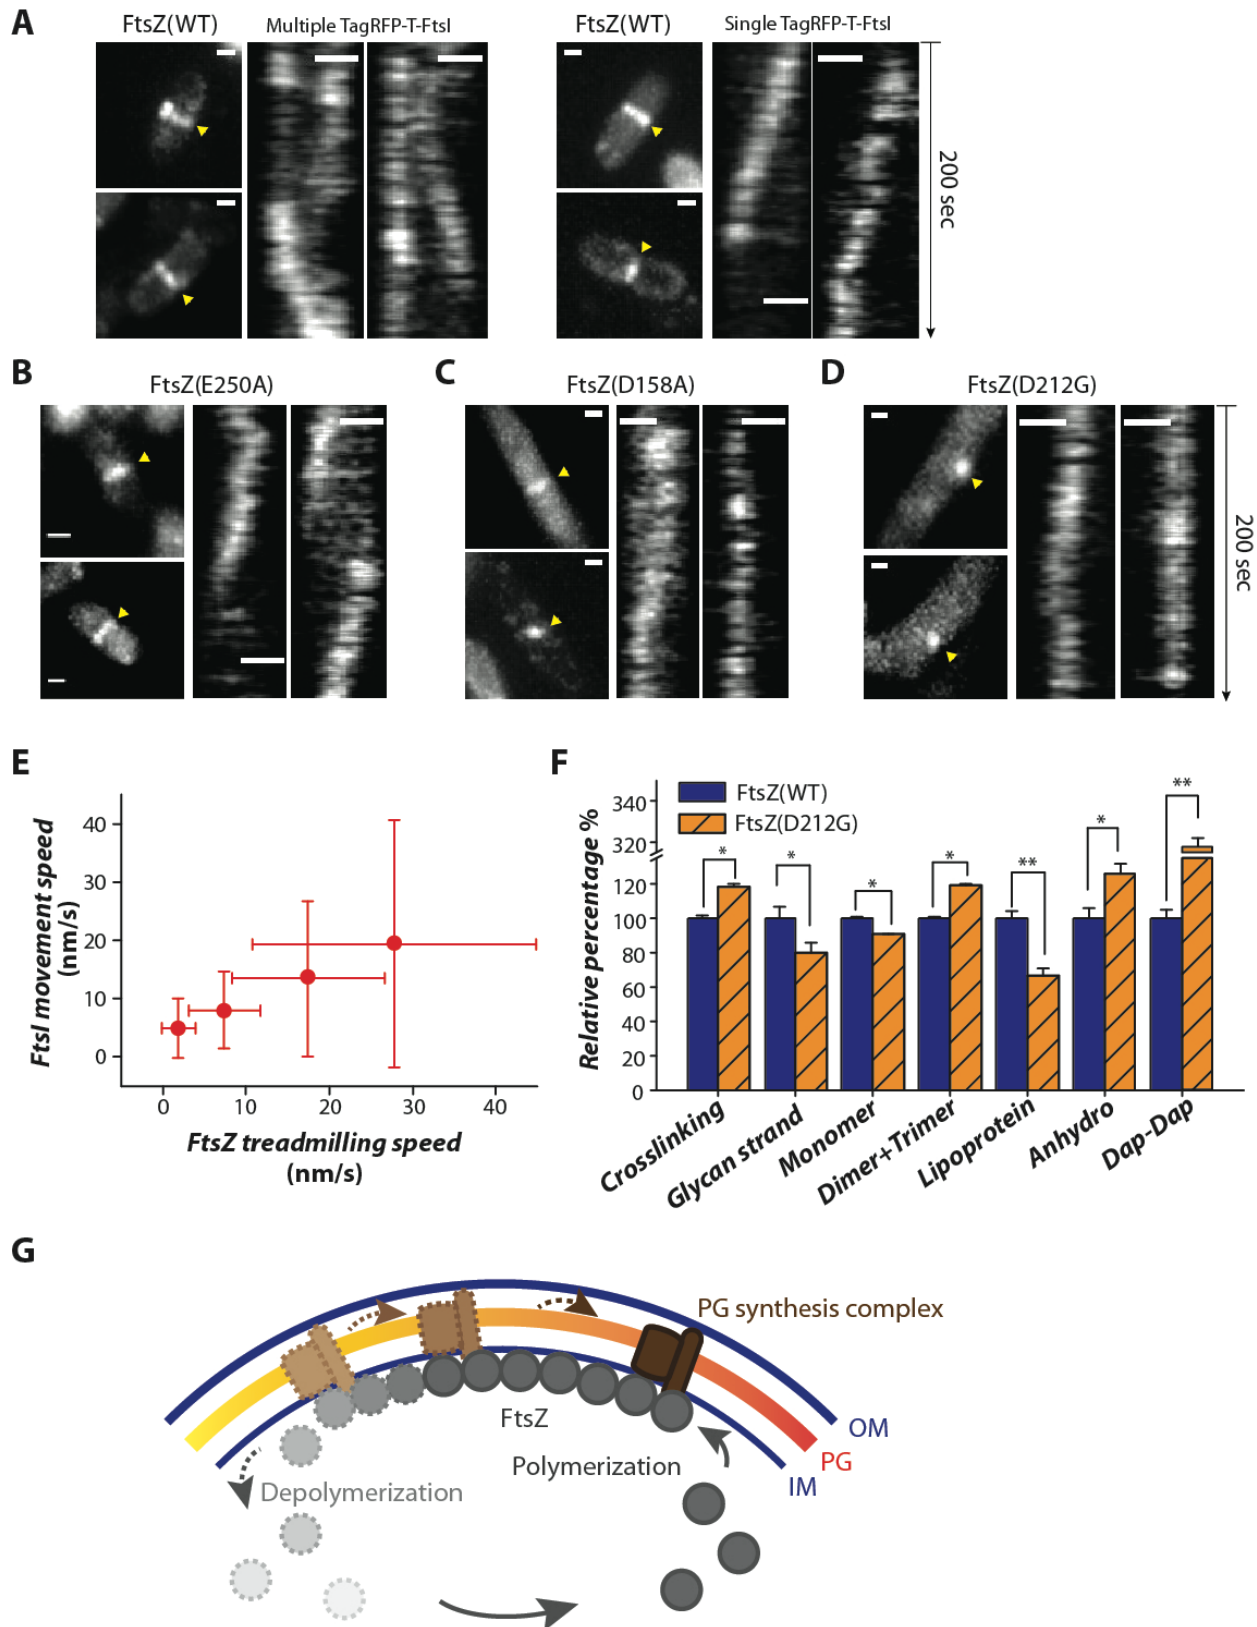

Source: http://biorxiv.org/content/10.1101/077610v1.full.pdf
